# Supplementary material for: T cell immunity to Zika virus targets immunodominant epitopes that show cross-reactivity with other Flaviviruses
Source: PubMed Central journal article supplement (PMC5766511; doi:10.1038/s41598-017-18781-1), 2018-01-12

## Supplementary Information

### **T cell immunity to Zika virus targets immunodominant epitopes that show cross-reactivity with other Flaviviruses**

Reynolds CJ<sup>1</sup>, Suleyman OM<sup>1</sup>, Ortega-Prieto AM<sup>1</sup>, Skelton JK<sup>1</sup>, Bonnesoeur P<sup>2</sup>, Blohm A<sup>1</sup>, Carregaro V<sup>3</sup>, Silva JS<sup>3</sup>, James EA<sup>4</sup>, Maillère B<sup>2</sup>, Dorner M<sup>1</sup>, Boyton RJ<sup>1¶\*</sup>, and Altmann DM<sup>1¶\*</sup>

<sup>1</sup>Department of Medicine, Imperial College London, London, United Kingdom

<sup>2</sup>CEA-Saclay, [Institute Frédéric Joliot](#), Gif Sur Yvette, France.

<sup>3</sup>Department of Biochemistry and Immunology, University of São Paulo Ribeirão Preto, Brazil.

<sup>4</sup>Benaroya Research Institute at Virginia Mason, Seattle, Washington, United States of America.

¶ co-senior authors

**Supplementary Table 1. ZIKV protein sequences: Env, NS1, NS3, and NS5**

| ZIKV protein | AA sequence |            |            |             |            |
|--------------|-------------|------------|------------|-------------|------------|
| Env          | IRCIGVSNRD  | FVEGMSGGTW | VDVVLEHGGC | VTVMAQDKPT  |            |
|              | VDIELVTTTV  | SNMAEVRSYC | YEASISDMAS | DSRCPTQGEA  |            |
|              | YLDKQSDTQY  | VCKRTLVDRG | WGNGCGLFGK | GSLVTCAKFA  |            |
|              | CSKKMTGKSI  | QPENLEYRIM | LSVHGSQHSG | MIVNDTGHET  |            |
|              | DENRAKVEIT  | PNSPRAEATL | GGFGSLGLDC | EPRTGLDFSD  |            |
|              | LYYLTMNNKH  | WLVHKEWFHD | IPLPWHAGAD | TGTPHWNNE   |            |
|              | ALVEFKDAHA  | KRQTVVVLGS | QEGAVHTALA | GALEAEMDGA  |            |
|              | KGRLSSGHLK  | CRLKMDKLRL | KGVSYSLCTA | AFTFTKIPAE  |            |
|              | TLHGTVTVEV  | QYAGTDGPCK | VPAQMAVDMQ | TLTPVGRLLIT |            |
|              | ANPVITESTE  | NSKMMELEDP | PFGDSYIVIG | VGEKKITHHW  |            |
|              | HRSGSTIGKA  | FEATVRGAKR | MAVLGDTAWD | FGSVGGALNS  |            |
|              | LKGKIHQIFG  | AAFKSLFGGM | SWFSQILIGT | LLMWLGLNTK  |            |
|              | NGSISLMCLA  | LGGVLIFLST | AVSA       |             |            |
|              | NS1         | DVGCSVDFSK | KETRCGTGVF | VYNDVEAWRD  | RYKYHPDSPR |
|              |             | RLAAAVKQAW | EDGICGISSV | SRMENIMWRS  | VEGELNAILE |
|              |             | ENGVQLTVVV | GSVKNPMWRG | PQRLPVPVNE  | LPHGWKAWGK |
|              |             | SYFVRAAKTN | NSFVVDGDTL | KECPLKHRAW  | NSFLVEDHGF |
| GVFHTSVWLK   |             | VREDYSLECD | PAVIGTAVKG | KEAVHSDLGY  |            |
| WIESEKNDTW   |             | RLKRAHLIEM | KTCEWPKSHT | LWTDGIEESD  |            |
| LIIPKSLAGP   |             | LSHHNTREGY | RTQMKGPPWS | EELEIRFEEC  |            |
| PGTKVHVEET   |             | CGTRGPSLRS | TTASGRVIEE | WCCRECTMPP  |            |
| LSFRAKDGCW   |             | YGMEIRPRKE | PESNLVRSMV | TA          |            |
| NS3          |             | SGALWDVPAP | KEVKKGETTD | GVYRVMTRRL  | LGSTQVGVGV |
|              |             | MQEGVFHTMW | HVTKGSALRS | GEGRLDPYWG  | DVKQDLVSYC |
|              | GPWKLDAAWD  | GHSEVQLLAV | PPGERARNIQ | TLPGIFKTKD  |            |
|              | GDIGAVALDY  | PAGTSGSPIL | DKCGRVIGLY | GNGVVIKNGS  |            |
|              | YVSAITQGRR  | EEETPVECFE | PSMLKKKQLT | VLDLHPGAGK  |            |
|              | TRRVLPEIVR  | EAIKTRLRTV | ILAPTRVVAA | EMEEALRGLP  |            |
|              | VRYMTTAVNV  | THSGTEIVDL | MCHATFTSRL | LQPIRVPNYN  |            |
|              | LYIMDEAHFT  | DPSSIAARGY | ISTRVEMGEA | AAIFMTATPP  |            |
|              | GTRDAFPDSN  | SPIMDTEVEV | PERAWSSGFD | WVTDHSGKTV  |            |
|              | WVFPVSRNGN  | EIAACLTKAG | KRVIQLSRKT | FETEFQKTKH  |            |
|              | QEWDFVVTDD  | ISEMGANFKA | DRVIDSRRL  | KPVILDGERV  |            |
|              | ILAGPMPVTH  | ASAAQRRGRI | GRNPNKPGDE | YLYGGCAET   |            |
|              | DEDHAHWLEA  | RMLLDNIYLQ | DGLIASLYRP | EADKVA AIEG |            |
|              | EFKLRTEQRK  | TFVELMKRGD | LPVWLAYQVA | SAGITYTDRR  |            |
|              | WCFDGTNNNT  | IMEDSVPAEV | WTRHGEKRVL | KPRWMDARVC  |            |

SDHAALKSFK EFAAGKR

NS5

GGGTGETLGE KWKARLNQMS ALEFYSSYKKS GITEVCREEA  
RRALKDGVAT GGHAVSRGSA KLRWLVERGY LQPYGKVIDL  
GCGRGGWSYY AATIRKVQEV KGYTKGGPGH EEPVLVQSYG  
WNIVRLKSGV DVFHMAAEPD DTLLCDIGES SSSPEVEEAR  
TLRVLSMVGD WLEKRPGAFC IKVLCPYTST MMETLERLQR  
RYGGGLVRVP LSRNSTHEMY WVSGAKSNTI KSVSTTSQLL  
LGRMDGPRRP VKYEEDVNLG SGTRAVVSCA EAPNMKIIGN  
RIERIRSEHA ETWFFDENHP YRTWAYHGSY EAPTQGSASS  
LINGVVRLLS KPWDVVTGVT GIAMTDTPY GOQRVFKKVV  
DTRVPDPQEG TRQVMSMVSS WLWKELGKHK RPRVCTKEEF  
INKVRSNAAL GAIFEEEEKEW KTAVEAVNDP RFWALVDKER  
EHHLRGECQS CVYNNMMGKRE KKQGEFGKAK GSRAIWYMWL  
GARFLEFEAL GFLNEDHWMG RENSGGGVEG LGLQRLGYVL  
EEMSRIPEGGR MYADDTAGWD TRISRFDLEN EALITNQMEK  
GHRALALAI KYTYQNKVVK VLRPAEKGKT VMDIISRQDQ  
RSGSQVVTYA LNTFTNLVVQ LIRNMEAEV LEMQDLWLLR  
RSEKVTNWLQ SNGWDRLKRM AVSGDDCVVK PIDDRFAHAL  
RFLNDMGKVR KDTQEWKPST GWDNWEEVPF CSHHFNKLHL  
KDGRSIVVPC RHQDELIGRA RVSPGAGWSI RETACLAKSY  
AQMWOQLLYFH RRDRLMANA ICSSVPVDWV PTGRTTWSIH  
GKGEWMTTED MLVVWNRVWI EENDHMEDKT PVTKWTDIPY  
LGKREDLWCG SLIGHRPRTT WAENIKNTVN MVRRIIGDEE  
KYMDYLSTQV RYLGEESTP GVL

**Supplementary Table 2. ZIKV protein antigen peptide panels for NS1, NS3, NS5, and Env**

| <b>ZIKV NS1 (10AA OVERLAP)</b> |                     |                         |
|--------------------------------|---------------------|-------------------------|
| <b>PEPTIDE NO.</b>             | <b>peptide name</b> | <b>peptide sequence</b> |
| <b>1</b>                       | Zika NS1 [1-20]     | DVGCSVDFSKKETRCGTGVF    |
| <b>2</b>                       | Zika NS1 [11-30]    | KETRCGTGVFVYNDVEAWRD    |
| <b>3</b>                       | Zika NS1 [21-40]    | VYNDVEAWRDRYKYHPDSPR    |
| <b>4</b>                       | Zika NS1 [31-50]    | RYKYHPDSPRRLAAAVKQAW    |
| <b>5</b>                       | Zika NS1 [41-60]    | RLAAAVKQAWEDGICGISSV    |
| <b>6</b>                       | Zika NS1 [51-70]    | EDGICGISSVSRMENIMWRS    |
| <b>7</b>                       | Zika NS1 [61-80]    | SRMENIMWRSVEGELNAILE    |
| <b>8</b>                       | Zika NS1 [71-90]    | VEGELNAILEENGVQLTVVV    |
| <b>9</b>                       | Zika NS1 [81-100]   | ENGVQLTVVVGSVKNPMWRG    |
| <b>10</b>                      | Zika NS1 [91-110]   | GSVKNPMWRGPQRLPVPVNE    |
| <b>11</b>                      | Zika NS1 [101-120]  | PQRLPVPVNELPHGWKAWGK    |
| <b>12</b>                      | Zika NS1 [111-130]  | LPHGWKAWGKSYFVRAAKTN    |
| <b>13</b>                      | Zika NS1 [121-140]  | SYFVRAAKTNNSFVVDGDTL    |
| <b>14</b>                      | Zika NS1 [131-150]  | NSFVVDGDTLKECPLKHRAW    |
| <b>15</b>                      | Zika NS1 [141-160]  | KECPLKHRAWNSFLVEDHGF    |
| <b>16</b>                      | Zika NS1 [151-170]  | NSFLVEDHGFVGFHTSVWLK    |
| <b>17</b>                      | Zika NS1 [161-180]  | GVFHTSVWLKVREDYSLECD    |
| <b>18</b>                      | Zika NS1 [171-190]  | VREDYSLECDPAVIGTAVKG    |
| <b>19</b>                      | Zika NS1 [181-200]  | PAVIGTAVKGKEAVHSDLGY    |
| <b>20</b>                      | Zika NS1 [191-210]  | KEAVHSDLGYWIESEKNDTW    |
| <b>21</b>                      | Zika NS1 [201-220]  | WIESEKNDTWRLKRAHLIEM    |
| <b>22</b>                      | Zika NS1 [211-230]  | RLKRAHLIEMKTCEWPKSHT    |
| <b>23</b>                      | Zika NS1 [221-240]  | KTCEWPKSHTLWTDGIEESD    |
| <b>24</b>                      | Zika NS1 [231-250]  | LWTDGIEESDLIIPKSLAGP    |
| <b>25</b>                      | Zika NS1 [241-260]  | LIIPKSLAGPLSHHNTREGY    |
| <b>26</b>                      | Zika NS1 [251-270]  | LSHHNTREGYRTQMKGPHWS    |
| <b>27</b>                      | Zika NS1 [261-280]  | RTQMKGPHWSEELEIRFEEC    |
| <b>28</b>                      | Zika NS1 [271-290]  | EELEIRFEECPGTKVHVEET    |
| <b>29</b>                      | Zika NS1 [281-300]  | PGTKVHVEETCGTRGPSLRS    |
| <b>30</b>                      | Zika NS1 [291-310]  | CGTRGPSLRSTTASGRVIEE    |
| <b>31</b>                      | Zika NS1 [301-320]  | TTASGRVIEEWCCRECTMPP    |
| <b>32</b>                      | Zika NS1 [311-330]  | WCCRECTMPPLSFRAKDGCW    |
| <b>33</b>                      | Zika NS1 [321-340]  | LSFRAKDGCWYGMEIRPRKE    |
| <b>34</b>                      | Zika NS1 [331-350]  | YGMEIRPRKEPESNLVRSMV    |
| <b>35</b>                      | Zika NS1 [333-352]  | MEIRPRKEPESNLVRSMVTA    |

### ZIKV NS3 (10AA OVERLAP)

| PEPTIDE NO. | peptide name       | peptide sequence     |
|-------------|--------------------|----------------------|
| 1           | Zika NS3 [1-20]    | SGALWDVPAPKEVKKGETTD |
| 2           | Zika NS3 [11-30]   | KEVKKGETTDGVYRVMTRRL |
| 3           | Zika NS3 [21-40]   | GVYRVMTRRLLGSTQVGVGV |
| 4           | Zika NS3 [31-50]   | LGSTQVGVGVMQEGVFHTMW |
| 5           | Zika NS3 [41-60]   | MQEGVFHTMWHVTKGSALRS |
| 6           | Zika NS3 [51-70]   | HVTKGSALRSGEGRLDPYWG |
| 7           | Zika NS3 [61-80]   | GEGRLDPYWGDKVQDLVSYC |
| 8           | Zika NS3 [71-90]   | DVKQDLVSYCGPWKLDAAWD |
| 9           | Zika NS3 [81-100]  | GPWKLDAAWDGHSEVQLLAV |
| 10          | Zika NS3 [91-110]  | GHSEVQLLAVPPGERARNIQ |
| 11          | Zika NS3 [101-120] | PPGERARNIQTLPGIFKTKD |
| 12          | Zika NS3 [111-130] | TLPGIFKTKDGDIGAVALDY |
| 13          | Zika NS3 [121-140] | GDIGAVALDYPAGTSGSPIL |
| 14          | Zika NS3 [131-150] | PAGTSGSPILDKCGRVIGLY |
| 15          | Zika NS3 [141-160] | DKCGRVIGLYGNGVVIKNGS |
| 16          | Zika NS3 [151-170] | GNGVVIKNGSYVSAITQGRR |
| 17          | Zika NS3 [161-180] | YVSAITQGRREEETPVECFE |
| 18          | Zika NS3 [171-190] | EEETPVECFEPSMLKKKQLT |
| 19          | Zika NS3 [181-200] | PSMLKKKQLTVLDLHPGAGK |
| 20          | Zika NS3 [191-210] | VLDLHPGAGKTRRVLPEIVR |
| 21          | Zika NS3 [201-220] | TRRVLPEIVREAIKTRLRTV |
| 22          | Zika NS3 [211-230] | EAIKTRLRTVILAPTRVVAA |
| 23          | Zika NS3 [221-240] | ILAPTRVVAAEMEEALRGLP |
| 24          | Zika NS3 [231-250] | EMEEALRGLPVRYMTTAVNV |
| 25          | Zika NS3 [241-260] | VRYMTTAVNVTHSGTEIVDL |
| 26          | Zika NS3 [251-270] | THSGTEIVDLMCHATFTSRL |
| 27          | Zika NS3 [261-280] | MCHATFTSRLLOPIRVPNYN |
| 28          | Zika NS3 [271-290] | LQPIRVPNYNLYIMDEAHFT |
| 29          | Zika NS3 [281-300] | LYIMDEAHFTDPSSIAARGY |
| 30          | Zika NS3 [291-310] | DPSSIAARGYISTRVEMGEA |
| 31          | Zika NS3 [301-320] | ISTRVEMGEAAAIFMTATPP |
| 32          | Zika NS3 [311-330] | AAIFMTATPPGTRDAFPDSN |
| 33          | Zika NS3 [321-340] | GTRDAFPDSNSPIMDTEVEV |
| 34          | Zika NS3 [331-350] | SPIMDTEVEVPERAWSSGFD |
| 35          | Zika NS3 [341-360] | PERAWSSGFDWVTDHSGKTV |
| 36          | Zika NS3 [351-370] | WVTDHSGKTVWFVPSVRNGN |
| 37          | Zika NS3 [361-380] | WFVPSVRNGNEIAACLTKAG |
| 38          | Zika NS3 [371-390] | EIAACLTKAGKRVIQLSRKT |
| 39          | Zika NS3 [381-400] | KRVIQLSRKTFETEFQKTKH |
| 40          | Zika NS3 [391-410] | FETEFQKTKHQEWDFVVTTD |
| 41          | Zika NS3 [401-420] | QEWDFVVTTDISEMGANFKA |

|           |                    |                        |
|-----------|--------------------|------------------------|
| <b>42</b> | Zika NS3 [411-430] | I SEMGANFKADRVIDSRRL   |
| <b>43</b> | Zika NS3 [421-440] | DRVIDSRRLKPVILDGERV    |
| <b>44</b> | Zika NS3 [431-450] | KPVILDGERVILAGPMPVTH   |
| <b>45</b> | Zika NS3 [441-460] | ILAGPMPVTHASAAQRRGRI   |
| <b>46</b> | Zika NS3 [451-470] | ASAAQRRGRIGRNPKNKPGDE  |
| <b>47</b> | Zika NS3 [461-480] | GRNPKNKPGDEYLYGGGCAET  |
| <b>48</b> | Zika NS3 [471-490] | YLYGGGCAETDEDHAHWLEA   |
| <b>49</b> | Zika NS3 [481-500] | DEDHAHWLEARMLLDNIYLQ   |
| <b>50</b> | Zika NS3 [491-510] | RMLLDNIYLQDGLIASLYRP   |
| <b>51</b> | Zika NS3 [501-520] | DGLIASLYRPEADKVA AIEG  |
| <b>52</b> | Zika NS3 [511-530] | EADKVA AIEGEFKLRTEQRK  |
| <b>53</b> | Zika NS3 [521-540] | EFKLRTEQRKTFVELMKRGD   |
| <b>54</b> | Zika NS3 [531-550] | TFVELMKRGDLPVWLAYQVA   |
| <b>55</b> | Zika NS3 [541-560] | LPVWLAYQVASAGITYTDRR   |
| <b>56</b> | Zika NS3 [551-570] | SAGITYTDRRWCFDGTNNNT   |
| <b>57</b> | Zika NS3 [561-580] | WCFDGTNNNTIMEDSVPAEV   |
| <b>58</b> | Zika NS3 [571-590] | IMEDSVPAEVWTRHGEKRVL   |
| <b>59</b> | Zika NS3 [581-600] | WTRHGEKRVLKPRWMDARVC   |
| <b>60</b> | Zika NS3 [591-610] | KPRWMDARVCS DHAALKSFK  |
| <b>61</b> | Zika NS3 [598-617] | RVCS DHAALKSFK EFAAGKR |

### ZIKV NS5 (10AA OVERLAP)

| PEPTIDE NO. | peptide name       | peptide sequence     |
|-------------|--------------------|----------------------|
| 1           | Zika NS5 [1-20]    | GGGTGETLGEKWKARLNQMS |
| 2           | Zika NS5 [11-30]   | KWKARLNQMSALEFYKKS   |
| 3           | Zika NS5 [21-40]   | ALEFYKKS GITEVCREEA  |
| 4           | Zika NS5 [31-50]   | GITEVCREEARRALKDGVAT |
| 5           | Zika NS5 [41-60]   | RRALKDGVATGGHAVSRGSA |
| 6           | Zika NS5 [51-70]   | GGHAVSRGSAKLRWLVERGY |
| 7           | Zika NS5 [61-80]   | KLRWLVERGYLQPYGKVIDL |
| 8           | Zika NS5 [71-90]   | LQPYGKVIDLGCGRGGWSYY |
| 9           | Zika NS5 [81-100]  | GCGRGGWSYYAATIRKVQEV |
| 10          | Zika NS5 [91-110]  | AATIRKVQEVKGYTKGGPGH |
| 11          | Zika NS5 [101-120] | KGYTKGGPGHEEPVLVQSYG |
| 12          | Zika NS5 [111-130] | EELVQSYGWNIVRLKSGV   |
| 13          | Zika NS5 [121-140] | WNIVRLKSGVDVFMMAEPC  |
| 14          | Zika NS5 [131-150] | DVFMMAEPCDTLLCDIGES  |
| 15          | Zika NS5 [141-160] | DTLLCDIGESSSSPEVEEAR |
| 16          | Zika NS5 [151-170] | SSSPEVEEARTLRVLSMVG  |
| 17          | Zika NS5 [161-180] | TLRVLSMVGDWLEKRPAGFC |
| 18          | Zika NS5 [171-190] | WLEKRPAGFCIKVLCPYTST |
| 19          | Zika NS5 [181-200] | IKVLCPYTSTMMETLERLQR |
| 20          | Zika NS5 [191-210] | MMETLERLQRRYGGGLVRVP |
| 21          | Zika NS5 [201-220] | RYGGGLVRVPLSRNSTHEMY |
| 22          | Zika NS5 [211-230] | LSRNSTHEMYWVSGAKSNTI |
| 23          | Zika NS5 [221-240] | WVSGAKSNTIKSVSTTSQLL |
| 24          | Zika NS5 [231-250] | KSVSTTSQLLLGRMDGPRRP |
| 25          | Zika NS5 [241-260] | LGRMDGPRRPVKYEEDVNLG |
| 26          | Zika NS5 [251-270] | VKYEEDVNLGSGTRAVVSCA |
| 27          | Zika NS5 [261-280] | SGTRAVVSCAEAPNMKIIGN |
| 28          | Zika NS5 [271-290] | EAPNMKIIGNRIERIRSEHA |
| 29          | Zika NS5 [281-300] | RIERIRSEHAETWFFDENHP |
| 30          | Zika NS5 [291-310] | ETWFFDENHPYRTWAYHGSY |
| 31          | Zika NS5 [301-320] | YRTWAYHGSYEAPTQGSASS |
| 32          | Zika NS5 [311-330] | EAPTQGSASSLINGVVRLLS |
| 33          | Zika NS5 [321-340] | LINGVVRLLSKPWDVVTGVT |
| 34          | Zika NS5 [331-350] | KPWDVVTGVTGIAMTDTTPY |
| 35          | Zika NS5 [341-360] | GIAMTDTTPYQQRVFKEKV  |
| 36          | Zika NS5 [351-370] | QQRVFKEKVDTRVPDPQEG  |
| 37          | Zika NS5 [361-380] | DTRVPDPQEGTRQVMSMVSS |
| 38          | Zika NS5 [371-390] | TRQVMSMVSSWLWELGKHK  |
| 39          | Zika NS5 [381-400] | WLWELGKHKRPRVCTKEEF  |
| 40          | Zika NS5 [391-410] | RPRVCTKEEFINKVRSNAAL |
| 41          | Zika NS5 [401-420] | INKVRSNAALGAIFEEKEW  |

|    |                    |                                         |
|----|--------------------|-----------------------------------------|
| 42 | Zika NS5 [411-430] | G A I F E E E K E W K T A V E A V N D P |
| 43 | Zika NS5 [421-440] | K T A V E A V N D P R F W A L V D K E R |
| 44 | Zika NS5 [431-450] | R F W A L V D K E R E H H L R G E C Q S |
| 45 | Zika NS5 [441-460] | E H H L R G E C Q S C V Y N M M G K R E |
| 46 | Zika NS5 [451-470] | C V Y N M M G K R E K K Q G E F G K A K |
| 47 | Zika NS5 [461-480] | K K Q G E F G K A K G S R A I W Y M W L |
| 48 | Zika NS5 [471-490] | G S R A I W Y M W L G A R F L E F E A L |
| 49 | Zika NS5 [481-500] | G A R F L E F E A L G F L N E D H W M G |
| 50 | Zika NS5 [491-510] | G F L N E D H W M G R E N S G G G V E G |
| 51 | Zika NS5 [501-520] | R E N S G G G V E G L G L Q R L G Y V L |
| 52 | Zika NS5 [511-530] | L G L Q R L G Y V L E E M S R I P G G R |
| 53 | Zika NS5 [521-540] | E E M S R I P G G R M Y A D D T A G W D |
| 54 | Zika NS5 [531-550] | M Y A D D T A G W D T R I S R F D L E N |
| 55 | Zika NS5 [541-560] | T R I S R F D L E N E A L I T N Q M E K |
| 56 | Zika NS5 [551-570] | E A L I T N Q M E K G H R A L A L A I I |
| 57 | Zika NS5 [561-580] | G H R A L A L A I I K Y T Y Q N K V V K |
| 58 | Zika NS5 [571-590] | K Y T Y Q N K V V K V L R P A E K G K T |
| 59 | Zika NS5 [581-600] | V L R P A E K G K T V M D I I S R Q D Q |
| 60 | Zika NS5 [591-610] | V M D I I S R Q D Q R G S G Q V V T Y A |
| 61 | Zika NS5 [601-620] | R G S G Q V V T Y A L N T F T N L V V Q |
| 62 | Zika NS5 [611-630] | L N T F T N L V V Q L I R N M E A E E V |
| 63 | Zika NS5 [621-640] | L I R N M E A E E V L E M Q D L W L L R |
| 64 | Zika NS5 [631-650] | L E M Q D L W L L R R S E K V T N W L Q |
| 65 | Zika NS5 [641-660] | R S E K V T N W L Q S N G W D R L K R M |
| 66 | Zika NS5 [651-670] | S N G W D R L K R M A V S G D D C V V K |
| 67 | Zika NS5 [661-680] | A V S G D D C V V K P I D D R F A H A L |
| 68 | Zika NS5 [671-690] | P I D D R F A H A L R F L N D M G K V R |
| 69 | Zika NS5 [681-700] | R F L N D M G K V R K D T Q E W K P S T |
| 70 | Zika NS5 [691-710] | K D T Q E W K P S T G W D N W E E V P F |
| 71 | Zika NS5 [701-720] | G W D N W E E V P F C S H H F N K L H L |
| 72 | Zika NS5 [711-730] | C S H H F N K L H L K D G R S I V V P C |
| 73 | Zika NS5 [721-740] | K D G R S I V V P C R H Q D E L I G R A |
| 74 | Zika NS5 [731-750] | R H Q D E L I G R A R V S P G A G W S I |
| 75 | Zika NS5 [741-760] | R V S P G A G W S I R E T A C L A K S Y |
| 76 | Zika NS5 [751-770] | R E T A C L A K S Y A Q M W Q L L Y F H |
| 77 | Zika NS5 [761-780] | A Q M W Q L L Y F H R R D L R L M A N A |
| 78 | Zika NS5 [771-790] | R R D L R L M A N A I C S S V P V D W V |
| 79 | Zika NS5 [781-800] | I C S S V P V D W V P T G R T T W S I H |
| 80 | Zika NS5 [791-810] | P T G R T T W S I H G K G E W M T T E D |
| 81 | Zika NS5 [801-820] | G K G E W M T T E D M L V V W N R V W I |
| 82 | Zika NS5 [811-830] | M L V V W N R V W I E E N D H M E D K T |
| 83 | Zika NS5 [821-840] | E E N D H M E D K T P V T K W T D I P Y |
| 84 | Zika NS5 [831-850] | P V T K W T D I P Y L G K R E D L W C G |
| 85 | Zika NS5 [841-860] | L G K R E D L W C G S L I G H R P R T T |



|           |                    |                       |
|-----------|--------------------|-----------------------|
| <b>86</b> | Zika NS5 [851-870] | SLIGHRPRTTWAENIKNTVN  |
| <b>87</b> | Zika NS5 [861-880] | WAENIKNTVNMVRRRIIGDEE |
| <b>88</b> | Zika NS5 [871-890] | MVRRRIIGDEEKYMDYLSTQV |
| <b>89</b> | Zika NS5 [881-900] | KYMDYLSTQVRYLGEEGSTP  |
| <b>90</b> | Zika NS5 [884-903] | DYLSTQVRYLGEEGSTPGVL  |

**ZIKV ENVELOPE PROTEIN Env (10AA OVERLAP)**

| <b>PEPTIDE NO.</b> | <b>peptide name</b> | <b>peptide sequence</b> |
|--------------------|---------------------|-------------------------|
| <b>1</b>           | Zika ENV [1-20]     | IRCIGVSNRDFVEGMSGGTW    |
| <b>2</b>           | Zika ENV [11-30]    | FVEGMSGGTWVDVVLEHGGC    |
| <b>3</b>           | Zika ENV [21-40]    | VDVVLEHGGCVTVMAQDKPT    |
| <b>4</b>           | Zika ENV [31-50]    | VTVMAQDKPTVDIELVTTTV    |
| <b>5</b>           | Zika ENV [41-60]    | VDIELVTTTVSNMAEVRSYC    |
| <b>6</b>           | Zika ENV [51-70]    | SNMAEVRSYCYEASISDMAS    |
| <b>7</b>           | Zika ENV [61-80]    | YEASISDMASDSRCPTQGEA    |
| <b>8</b>           | Zika ENV [71-90]    | DSRCPTQGEAYLDKQSDTOY    |
| <b>9</b>           | Zika ENV [81-100]   | YLDKQSDTOYVCKRTLVDGR    |
| <b>10</b>          | Zika ENV [91-110]   | VCKRTLVDGRWGNGCGLFGK    |
| <b>11</b>          | Zika ENV [101-120]  | WGNGCGLFGKGLVTCAKFA     |
| <b>12</b>          | Zika ENV [111-130]  | GSLVTCAKFACSKKMTGKSI    |
| <b>13</b>          | Zika ENV [121-140]  | CSKKMTGKSIQPENLEYRIM    |
| <b>14</b>          | Zika ENV [131-150]  | QPENLEYRIMLSVHGSQHSG    |
| <b>15</b>          | Zika ENV [141-160]  | LSVHGSQHSGMIVNDTGHET    |
| <b>16</b>          | Zika ENV [151-170]  | MIVNDTGHETDENRAKVEIT    |
| <b>17</b>          | Zika ENV [161-180]  | DENRAKVEITPNSPRAEATL    |
| <b>18</b>          | Zika ENV [171-190]  | PNSPRAEATLGGFGSLGLDC    |
| <b>19</b>          | Zika ENV [181-200]  | GGFGSLGLDCEPRTGLDFSD    |
| <b>20</b>          | Zika ENV [191-210]  | EPRTGLDFSDLYYLTMNNKH    |
| <b>21</b>          | Zika ENV [201-220]  | LYYLTMNNKHWLVHKEWFHD    |
| <b>22</b>          | Zika ENV [211-230]  | WLVHKEWFHDIPLPWHAGAD    |
| <b>23</b>          | Zika ENV [221-240]  | IPLPWHAGADTGTPHWNKE     |
| <b>24</b>          | Zika ENV [231-250]  | TGTPHWNKEALVEFKDAHA     |
| <b>25</b>          | Zika ENV [241-260]  | ALVEFKDAHAKRQTVVVLGS    |
| <b>26</b>          | Zika ENV [251-270]  | KRQTVVVLGSQEGAVHTALA    |
| <b>27</b>          | Zika ENV [261-280]  | QEGAVHTALAGALEAEMDGA    |
| <b>28</b>          | Zika ENV [271-290]  | GALEAEMDGAKGRLSSGHLK    |
| <b>29</b>          | Zika ENV [281-300]  | KGRLSSGHLKCRLKMDKLRL    |
| <b>30</b>          | Zika ENV [291-310]  | CRLKMDKLRLKGVSYSLCTA    |
| <b>31</b>          | Zika ENV [301-320]  | KGVSYSLCTAAFTFTKIPAE    |
| <b>32</b>          | Zika ENV [311-330]  | AFTFTKIPAE TLHGTVTVEV   |
| <b>33</b>          | Zika ENV [321-340]  | TLHGTVTVEVQYAGTDGPCK    |
| <b>34</b>          | Zika ENV [331-350]  | QYAGTDGPCKVPAQMAVDMQ    |
| <b>35</b>          | Zika ENV [341-360]  | VPAQMAVDMQTLTPVGRLIT    |
| <b>36</b>          | Zika ENV [351-370]  | TLTPVGRLITANPVITESTE    |
| <b>37</b>          | Zika ENV [361-380]  | ANPVITESTENSKMMLELDP    |
| <b>38</b>          | Zika ENV [371-390]  | NSKMMLELDPPFGDSYIVIG    |
| <b>39</b>          | Zika ENV [381-400]  | PFGDSYIVIGVGEKKITHHW    |
| <b>40</b>          | Zika ENV [391-410]  | VGEKKITHHWHRSGSTIGKA    |
| <b>41</b>          | Zika ENV [401-420]  | HRSGSTIGKA FEATVRGAKR   |

|           |                    |                      |
|-----------|--------------------|----------------------|
| <b>42</b> | Zika ENV [411-430] | FEATVRGAKRMAVLGDTAWD |
| <b>43</b> | Zika ENV [421-440] | MAVLGDTAWDFGSVGGALNS |
| <b>44</b> | Zika ENV [431-450] | FGSVGGALNSLGKGIHQIFG |
| <b>45</b> | Zika ENV [441-460] | LGKGIHQIFGAAFKSLFGGM |
| <b>46</b> | Zika ENV [451-470] | AAFKSLFGGMSWFSQILIGT |
| <b>47</b> | Zika ENV [461-480] | SWFSQILIGTLLMWLGLNTK |
| <b>48</b> | Zika ENV [471-490] | LLMWLGLNTKNGSISLMCLA |
| <b>49</b> | Zika ENV [481-500] | NGSISLMCLALGGVLIFLST |
| <b>50</b> | Zika ENV [485-504] | SLMCLALGGVLIFLSTAVSA |

**S1 Fig. CD4 T cell epitopes to ZIKV non-structural proteins NS1, NS3 and NS5 in HLA-DR1 and HLA-DR4 transgenic mice.**

Mice transgenic for HLA-DR1 (DRB1\*0101) (i) and HLA-DR4 (DRB1\*0401) (ii) were footpad primed with 25  $\mu$ g of recombinant ZIKV proteins NS1 (A), NS3 (B) and NS5 (C). Ten days after immunisation, draining lymph node (DLN) cells were assayed by IFN $\gamma$  ELISpot for recall responses to the immunising protein and to an overlapping panel of 20mer peptides spanning the length of each protein. Data shown are for n=6 mice per group except for (A ii) and (B i) which were n=4 and n=5 respectively. Data are plotted as number of spot forming cells (SFC) per  $10^6$  cells for individual mice. Responses were considered positive (+) if the response was greater than 2 SD above the mean of the response in the absence of any antigen (shown as horizontal dotted line).

# HLA-DR1 (DRB1\*0101)

A (i)

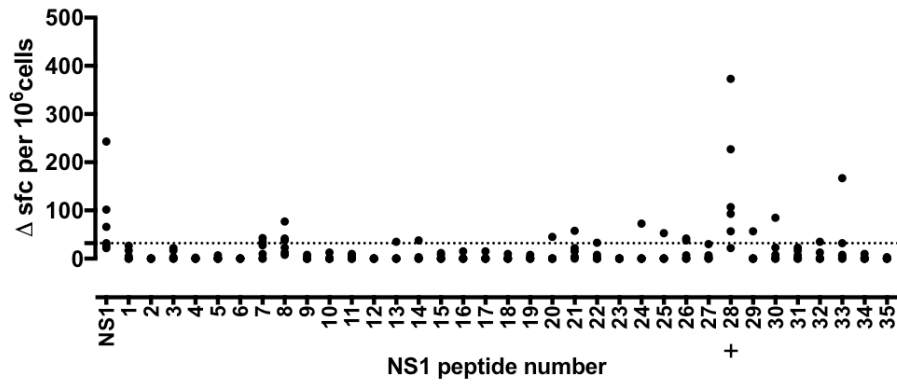

B (i)

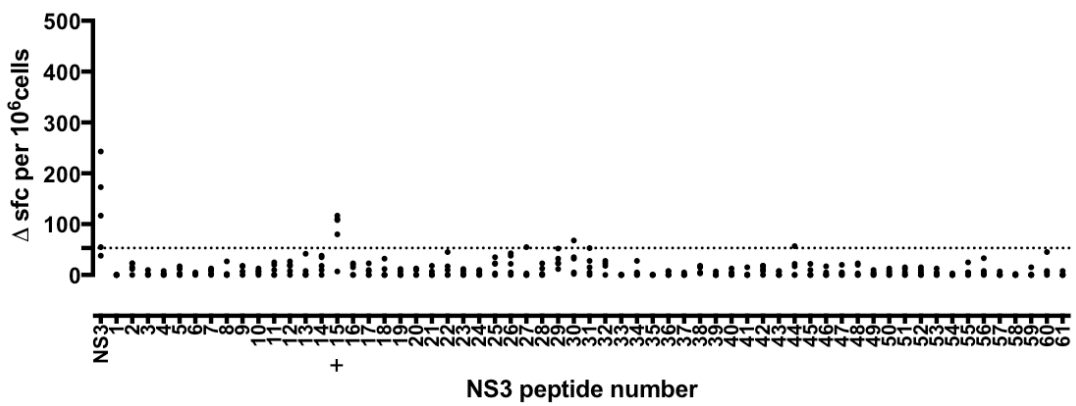

C (i)

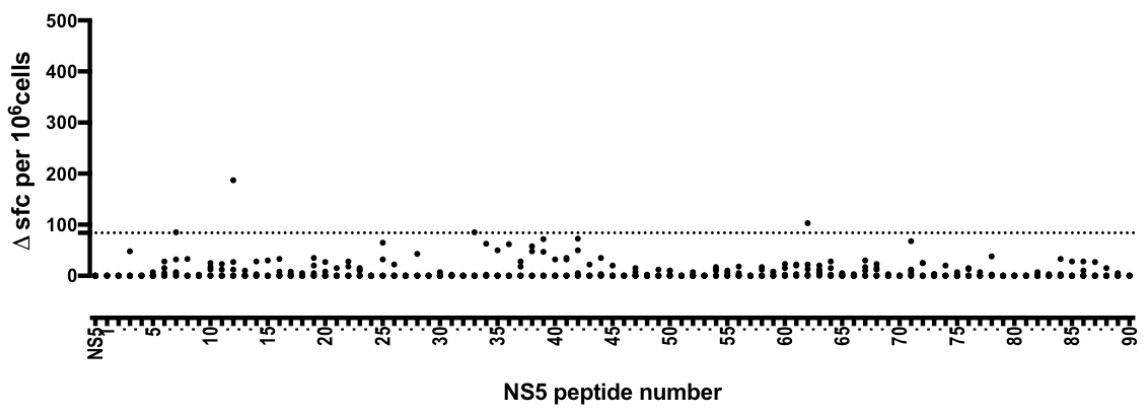

# HLA-DR4 (DRB1\*0401)

A (ii)

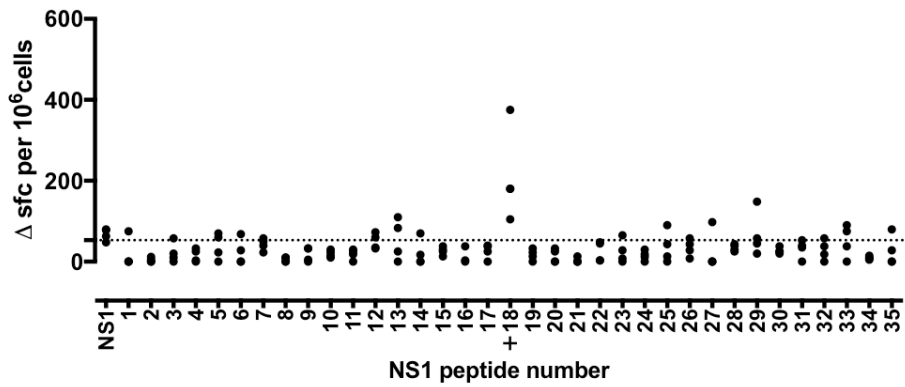

B (ii)

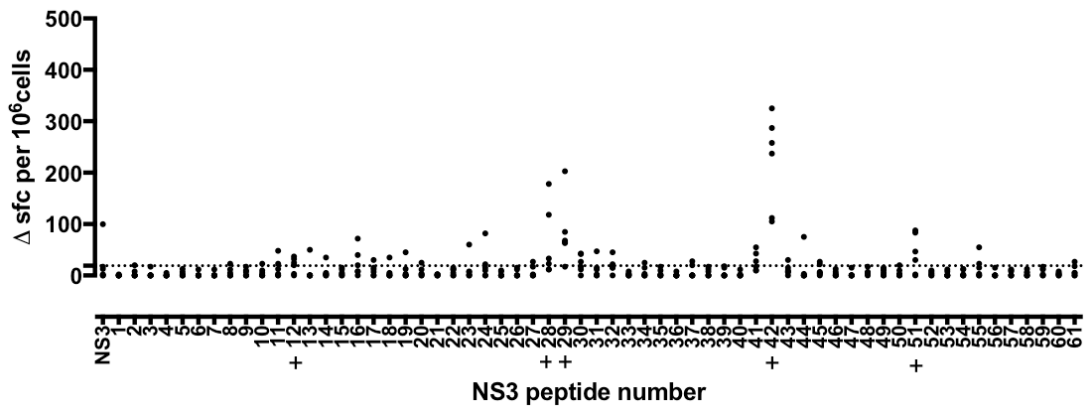

C (ii)

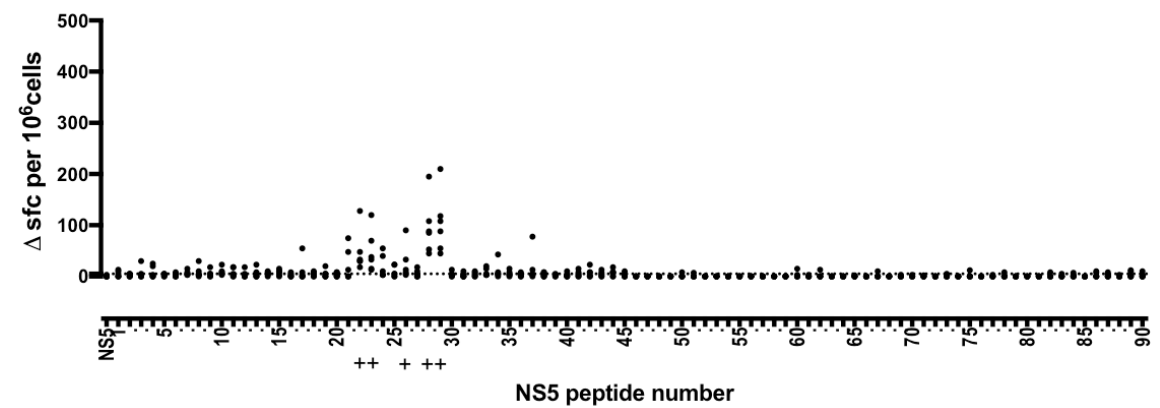

## **S2 Fig. CD4<sup>+</sup> and CD8<sup>+</sup> T cells respond to peptide 1 and variants of ZIKV Env**

Mice transgenic for HLA-DQ8 (DQB1\*0302) n=3 were primed with 25 µg of recombinant ZIKV envelope protein (Env). 11 days after immunisation, DLNs were cultured *in vitro* for 7 hours, in the presence of brefeldin A, with 25 µg/ml of Env peptide 10, Env peptide 1 or the peptide 1 variants of west Nile virus (WNV), yellow fever virus (YFV), dengue virus 1 (D1), dengue virus 2 (D2), dengue virus 3 (D3) or dengue virus 4 (D4). Cells were stained for the cell surface markers CD3, CD4 and CD8 and intracellularly for the production of IFN $\gamma$ . Data are plotted as the percentage of (A) CD4<sup>+</sup> T cells or (B) CD8<sup>+</sup> T cells producing IFN $\gamma$ . Data shown represent mean  $\pm$  SEM.

S2 Fig. CD4<sup>+</sup> and CD8<sup>+</sup> T cells respond to peptide 1 and variants of ZIKV Env

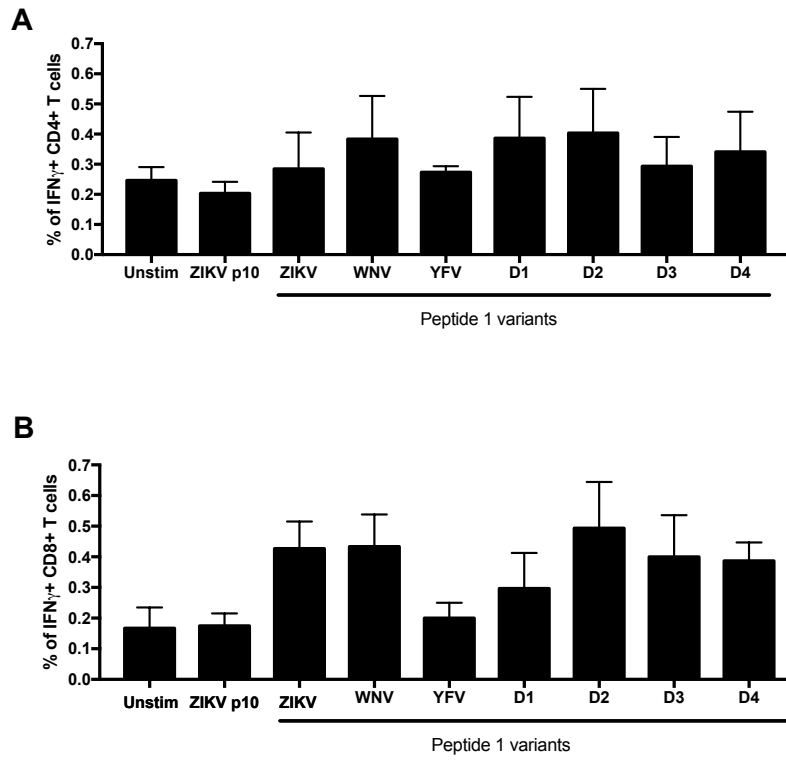



**S3 Fig. Draining lymph node (DLN) cells from HLA-DR1 transgenic mice primed with ZIKV Env and stained with HLA class II tetramers loaded with peptide confirm the presence of ZIKV Env p1 specific T cells and demonstrate a high degree of cross-reactivity with the DENV4 p1 variant peptide at the clonal level.**

HLA-DR1 (DRB1\*0101) mice were primed sub-cutaneously in one hind footpad with 25µg of recombinant protein emulsified in Hunters Titermax Gold adjuvant (Sigma-Aldrich, UK). Fourteen days post immunisation, the draining popliteal lymph node was removed and disaggregated into a single-cell suspension. Cells were stained with HLA-DRB1\*0101 tetramers loaded with either no peptide, ZIKV Env p1 or the DENV4 Env p1 variant followed by staining with an anti-mouse CD4 FITC antibody. (A) Samples were gated on live lymphocytes followed by CD4<sup>+</sup> cells before analysis of (B) ZIKV Env p1 specific T cells, (C) DENV4 Env p1 variant specific T cells and (D) dual ZIKV Env p1 and DENV4 Env p1 specific T cells.

**A**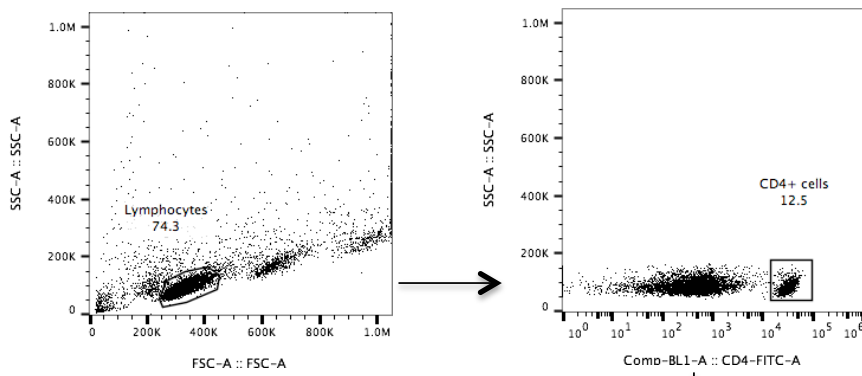**B**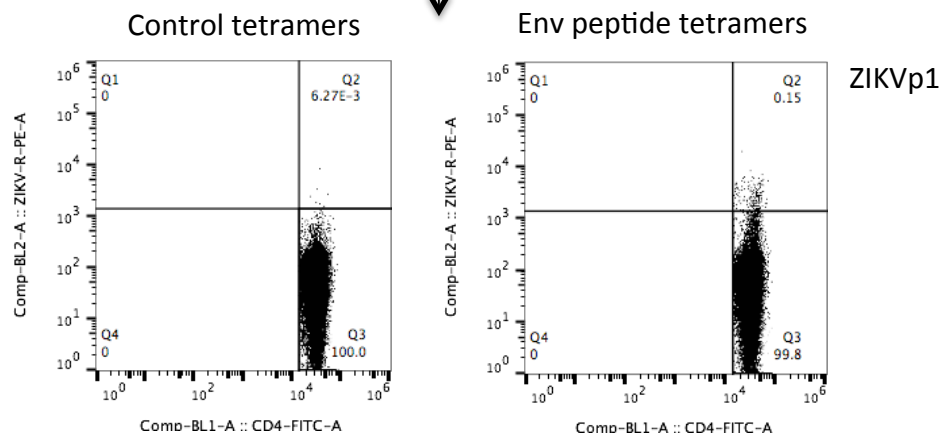**C**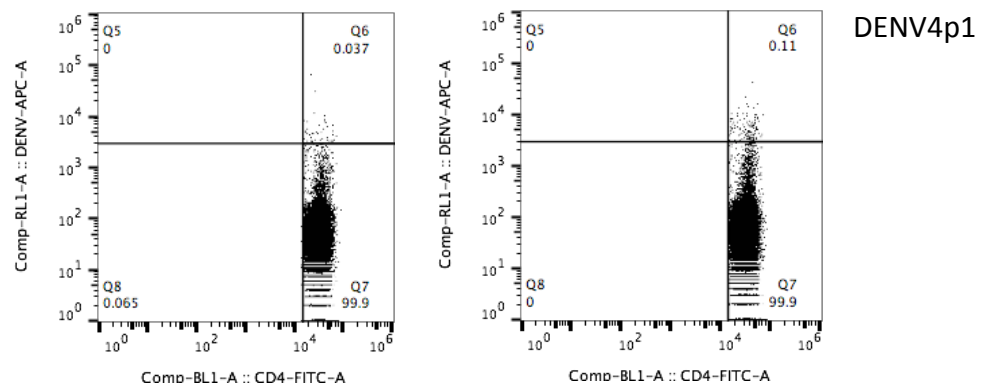**D**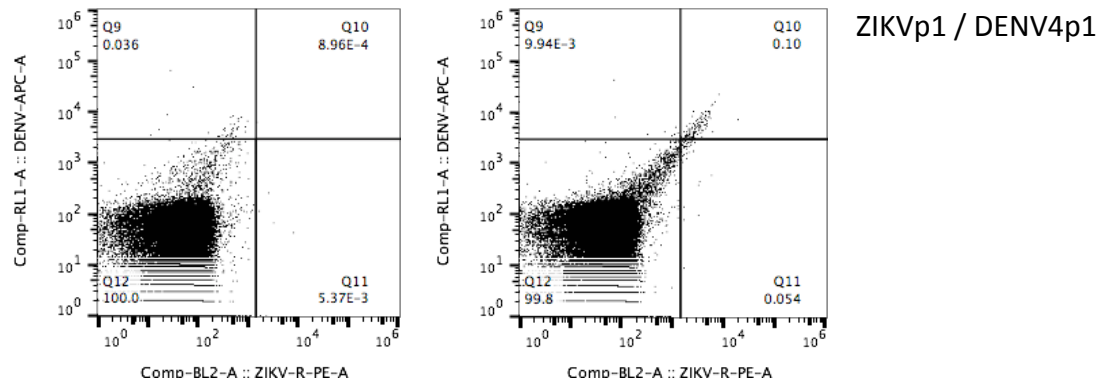

Supplement: 41598_2017_18781_MOESM1_ESM.pdf [file 41598_2017_18781_MOESM1_ESM.pdf]
